# Supplementary material for: Defects in dosage compensation impact global gene regulation in the mouse trophoblast
Source: Oxford University Press journal article supplement (doi:10.1242/dev.149138), 2017-07-06
Supplement: dev149138supp.pdf [file dev149138supp.pdf]

SUPPLEMENTAL FIGURES

A

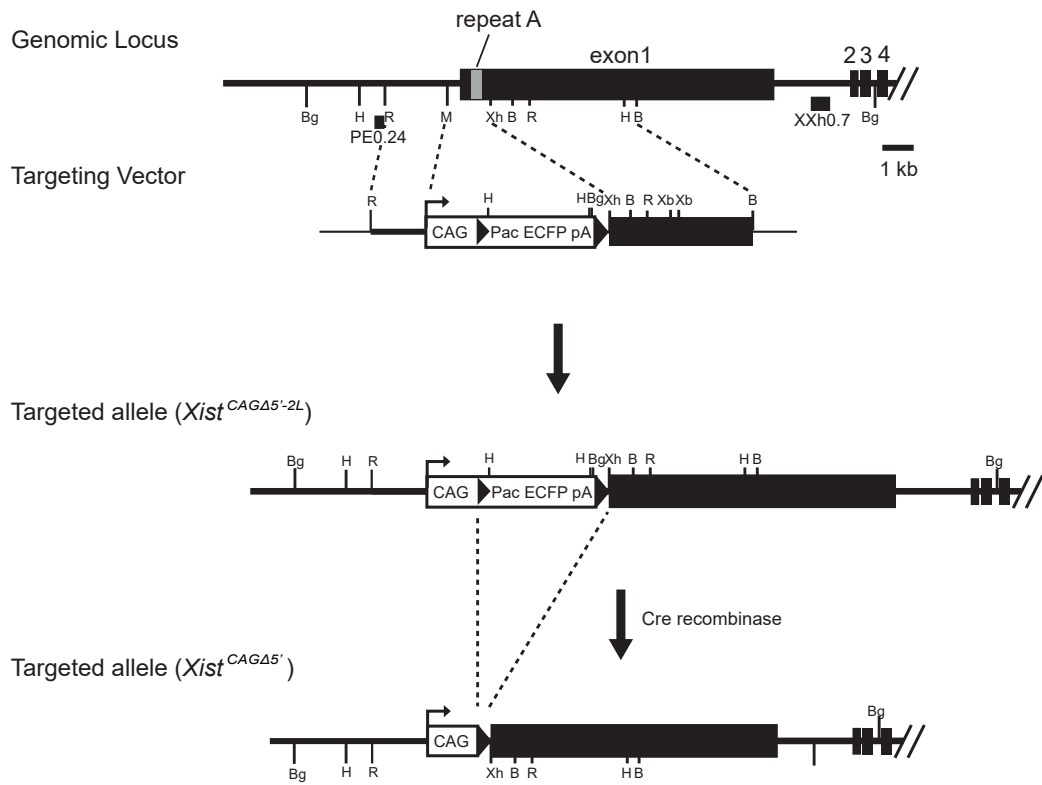

B

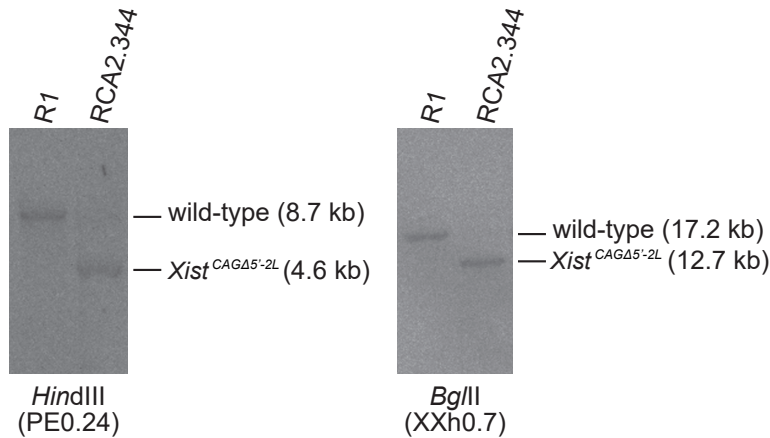

C

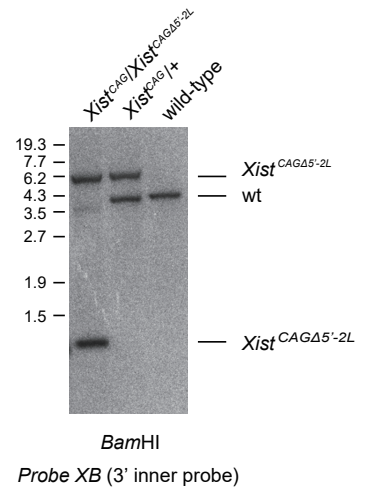

D

| XX x [X <sup>CAGΔ5'-2L</sup> Y;Tg(Pgk2-cre)] (3 weeks) |                      |                |       |
|--------------------------------------------------------|----------------------|----------------|-------|
|                                                        | XX <sup>CAGΔ5'</sup> | XY             | total |
| No. pups                                               | 0<br>(0 %)           | 141<br>(100 %) | 141   |
| 36 litters (3.9 pups/litter)                           |                      |                |       |

Fig. S1. Sakata & Nagao et al.

**Fig. S1. Targeting scheme for generating the *Xist*<sup>CAG $\Delta$ 5'</sup> allele**

**(A)** Genomic fragment containing the endogenous *Xist* promoter and the 5' region of exon 1 (-912 nt) was replaced with a CAG-Pac ECFP-pA cassette to produce the *Xist*<sup>CAG $\Delta$ 5'-2L</sup> allele. In the presence of cre recombinase, the *Xist*<sup>CAG $\Delta$ 5'-2L</sup> allele is converted into *Xist*<sup>CAG $\Delta$ 5'</sup>.

**(B)** Homologous recombination was confirmed by Southern blotting. RCA2.344 harbored the correct targeting event. Genomic DNA of RCA2.344 and parental R1 was digested with either *Hind*III (left) or *Bgl*II (right), transferred onto a nylon membrane, and probed with either PE0.24 (left) or XXh0.7 (right) (Sado, *et al*, 2005).

**(C)** Germline transmission of *Xist*<sup>CAG $\Delta$ 5'-2L</sup> was confirmed by Southern blotting. Southern blot containing tail DNA digested with *Xba*I was probed with XB (Ohhata, *et al*, 2008).

**(D)** Selective loss of female embryos carrying the paternal *Xist*<sup>CAG $\Delta$ 5'</sup> allele. No female pups were born upon paternal transmission of *Xist*<sup>CAG $\Delta$ 5'</sup>, strongly suggesting that imprinted X-inactivation was compromised in female embryos.

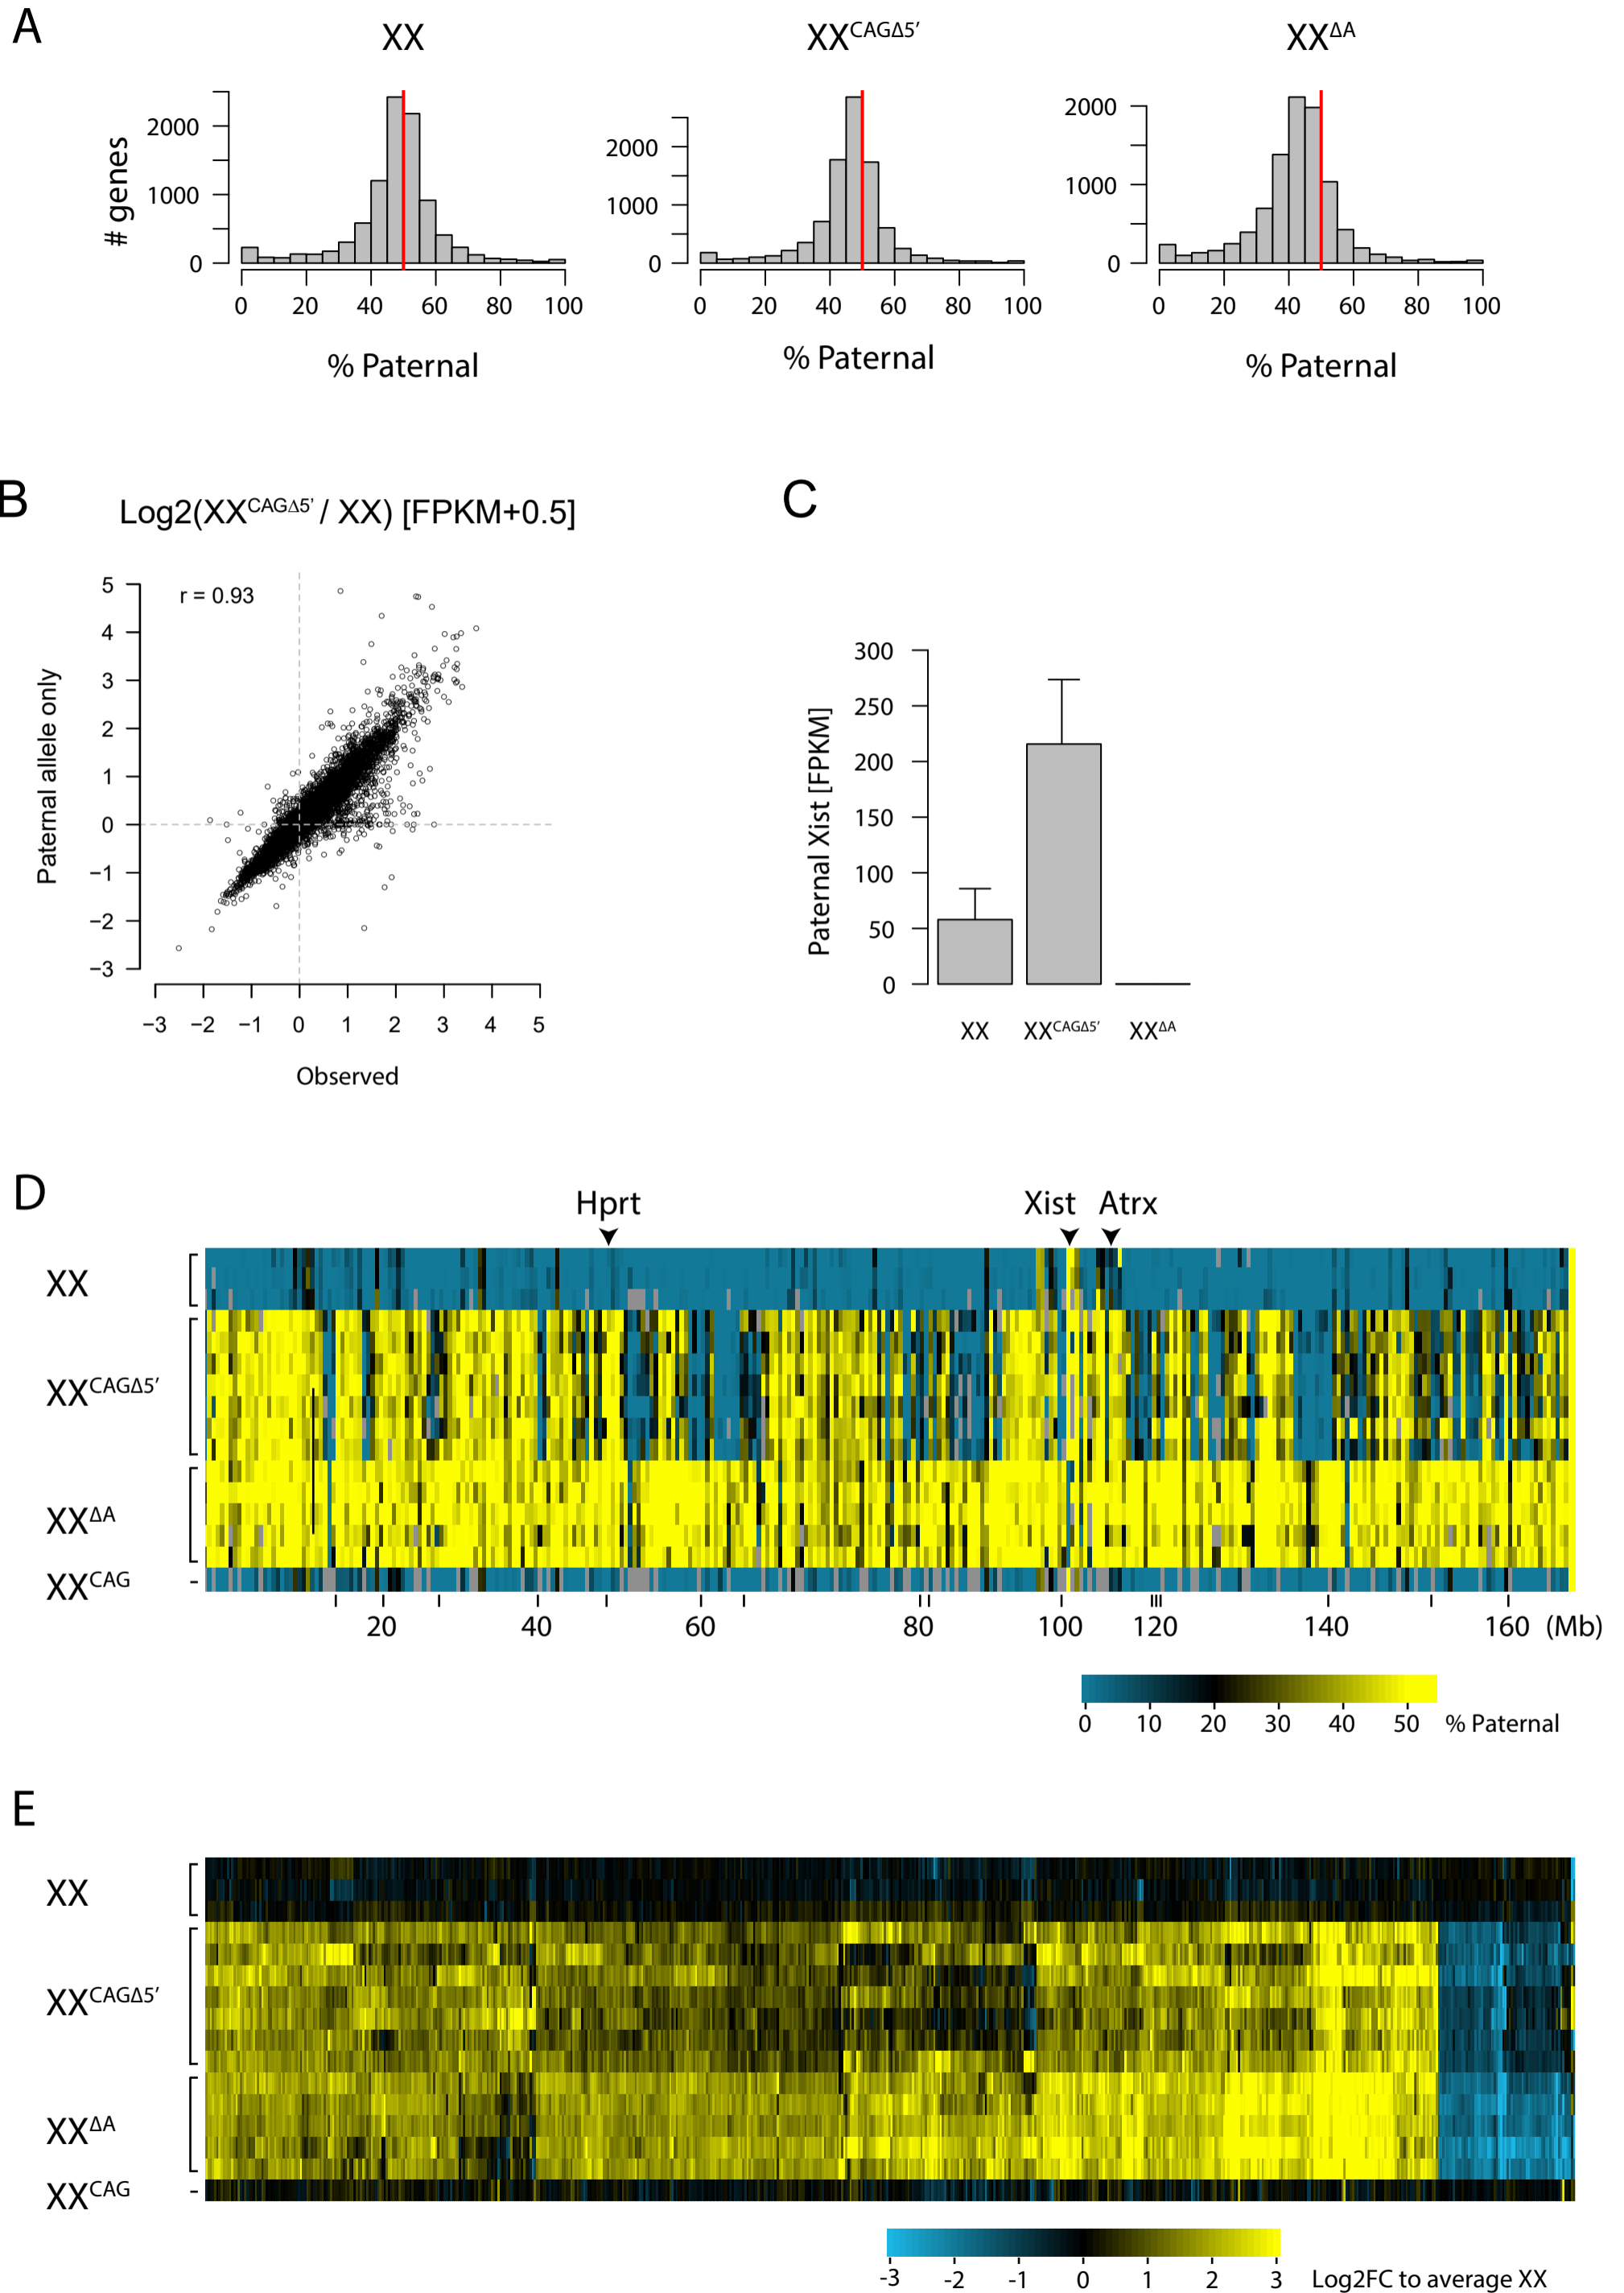

Fig. S2. Sakata & Nagao et al.

**Fig. S2. Expression profile of X-linked and autosomal genes in  $XX^{CAG^{\Delta 5'}}$  and  $XX^{\Delta A}$  in comparison with  $XX$ .**

- (A), (B) Most of the autosomal genes are biallelically expressed in the wild-type,  $XX^{CAG^{\Delta 5'}}$  and  $XX^{\Delta A}$  trophoblast. (A) Given that the mode of % paternal distribution among autosomal genes is slightly below 50% in  $XX^{CAG^{\Delta 5'}}$  and  $XX^{\Delta A}$ , it is likely that the maternal decidual tissues are contaminated in the trophoblast of both types of mutants. Since the majority of autosomal genes are expected to be equally expressed both among tissues and between alleles, we estimated that proportion of the maternal contamination in  $XX$ ,  $XX^{CAG^{\Delta 5'}}$  and  $XX^{\Delta A}$  are 0%, 5.2%, and 11.2%, respectively. (B) However, when the expression of the paternal copies, which could be identified only in the trophoblast, is extracted and plotted against the observed overall expression ratios of autosomal genes in  $XX^{CAG^{\Delta 5'}}$  relative to  $XX$ , the majority of misregulated genes exhibit a similar trend of changes as shown in Fig. 4F. This indicates that such maternal contamination would not affect our conclusion.
- (C) Expression levels of paternal *Xist* in each genotype are plotted as mean with standard deviation.
- (D) Comparison of % paternal reads of the 319 genes in all the individual trophoblast analyzed with their position along the X chromosome.
- (E) Heat map comparing the expression levels of the 1,277 autosomal genes shown in red in Figure 4F. Genes were aligned so that those show similar kinetics of the changes in their expression levels.

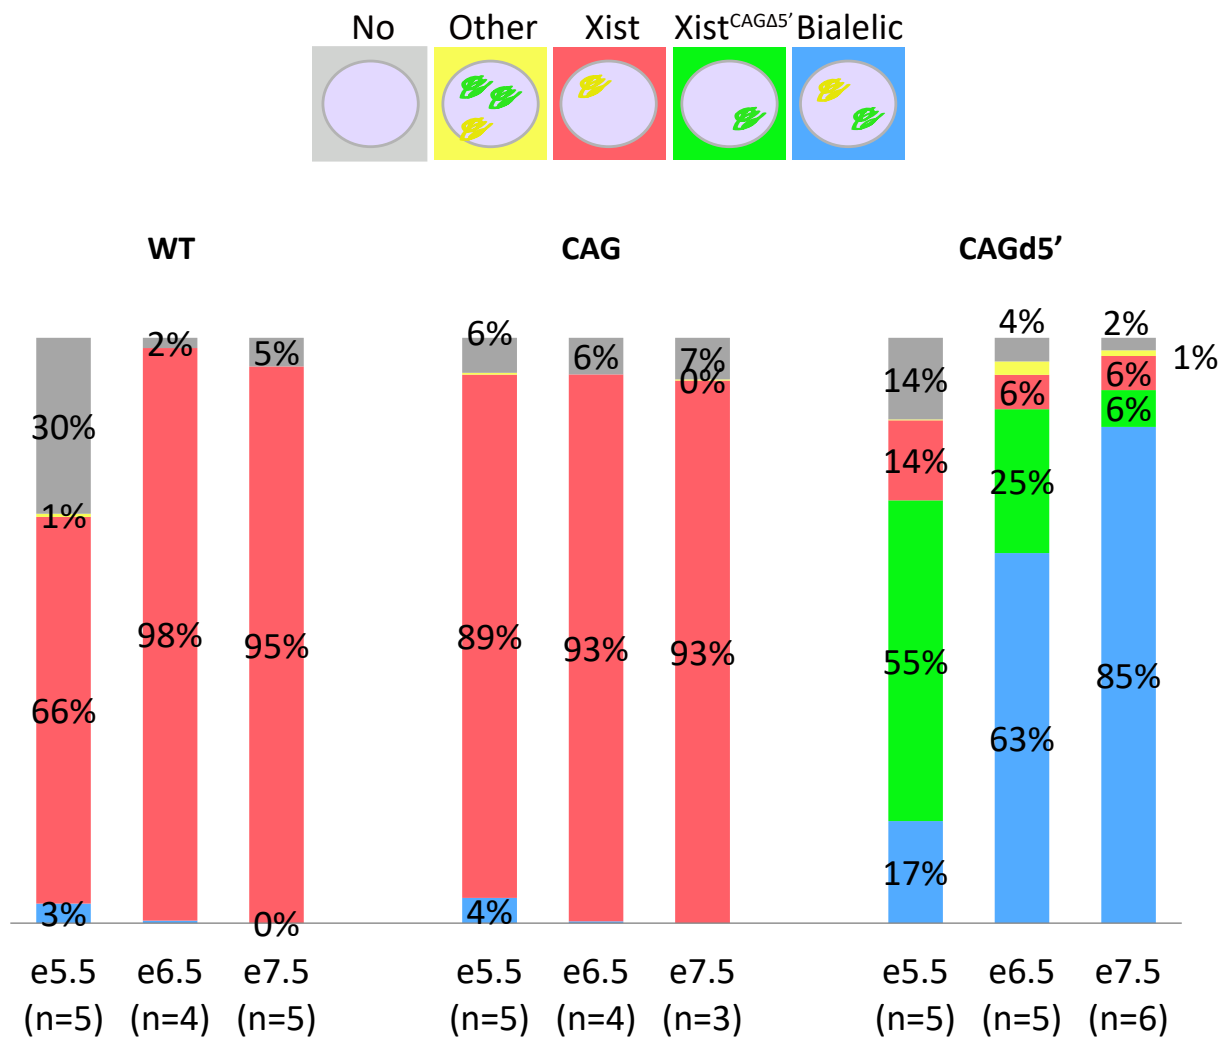

Fig. S3. Sakata &amp; Nagao et al.

**Fig. S3. Comparison of expression patterns of *Xist* in the embryonic tissue among respective genotypes at early postimplantation stages.**

Cells in the distal part of the embryo recovered from E5.5 to E7.5 were classified according to their expression patterns of *Xist* in respective genotype. While cells expressing either wild-type or mutated *Xist* RNA are both observed in XX<sup>CAGΔ5'</sup>, the population of those cells with biallelic expression increases over time. One reason why the prevalence of cells with a single mutant *Xist* cloud is higher than that of cells with a single wild-type *Xist* cloud could be ascribed to the fact that we did not remove the visceral endoderm, in which the mutated *Xist* allele is exclusively expressed due to imprinted X inactivation, from the distal part of the embryos enriched with the epiblast. Each Color of bar graphs matches that of rectangles showing respective patterns of *Xist* expression. Yellow *Xist* cloud, wild-type *Xist* RNA; green *Xist* cloud, *Xist*<sup>CAGΔ5'</sup> RNA; n, the number of embryos examined.

Table S1. Overrepresented GO terms for autosomal up-regulated genes ( $\geq 3$ -fold with significance)

| GOID       | Term                                                     | p-value  | Benjamini |
|------------|----------------------------------------------------------|----------|-----------|
| GO:0042127 | regulation of cell proliferation                         | 5.19E-18 | 3.11E-14  |
| GO:0070887 | cellular response to chemical stimulus                   | 2.02E-17 | 6.06E-14  |
| GO:0071310 | cellular response to organic substance                   | 5.43E-17 | 1.08E-13  |
| GO:0048514 | blood vessel morphogenesis                               | 8.62E-17 | 1.66E-13  |
| GO:0001568 | blood vessel development                                 | 1.47E-16 | 1.33E-13  |
| GO:0009966 | regulation of signal transduction                        | 2.05E-16 | 2.22E-13  |
| GO:0040012 | regulation of locomotion                                 | 3.72E-16 | 2.85E-13  |
| GO:2000026 | regulation of multicellular organismal development       | 3.87E-16 | 2.49E-13  |
| GO:0030334 | regulation of cell migration                             | 4.16E-16 | 2.95E-13  |
| GO:2000145 | regulation of cell motility                              | 4.18E-16 | 2.66E-13  |
| GO:0001944 | vasculature development                                  | 5.58E-16 | 3.02E-13  |
| GO:0010033 | response to organic substance                            | 5.65E-16 | 2.77E-13  |
| GO:0007166 | cell surface receptor signaling pathway                  | 1.98E-15 | 9.20E-13  |
| GO:0051270 | regulation of cellular component movement                | 2.01E-15 | 8.55E-13  |
| GO:0051241 | negative regulation of multicellular organismal process  | 2.73E-15 | 1.11E-12  |
| GO:0022603 | regulation of anatomical structure morphogenesis         | 2.84E-15 | 1.08E-12  |
| GO:0051240 | positive regulation of multicellular organismal process  | 5.06E-15 | 1.80E-12  |
| GO:0048870 | cell motility                                            | 1.32E-14 | 4.40E-12  |
| GO:0051674 | localization of cell                                     | 1.32E-14 | 4.40E-12  |
| GO:0009605 | response to external stimulus                            | 1.50E-14 | 4.72E-12  |
| GO:0008219 | cell death                                               | 1.61E-14 | 4.82E-12  |
| GO:0010646 | regulation of cell communication                         | 2.44E-14 | 6.96E-12  |
| GO:0016477 | cell migration                                           | 2.50E-14 | 6.80E-12  |
| GO:0012501 | programmed cell death                                    | 2.83E-14 | 7.37E-12  |
| GO:0040011 | locomotion                                               | 2.92E-14 | 7.29E-12  |
| GO:0042981 | regulation of apoptotic process                          | 4.08E-14 | 9.76E-12  |
| GO:0023051 | regulation of signaling                                  | 4.82E-14 | 1.11E-11  |
| GO:0048584 | positive regulation of response to stimulus              | 6.16E-14 | 1.37E-11  |
| GO:0043067 | regulation of programmed cell death                      | 7.49E-14 | 1.60E-11  |
| GO:0007167 | enzyme linked receptor protein signaling pathway         | 7.95E-14 | 1.64E-11  |
| GO:0045597 | positive regulation of cell differentiation              | 9.31E-14 | 1.86E-11  |
| GO:0072359 | circulatory system development                           | 9.70E-14 | 1.87E-11  |
| GO:0072358 | cardiovascular system development                        | 9.70E-14 | 1.87E-11  |
| GO:0008283 | cell proliferation                                       | 1.01E-13 | 1.89E-11  |
| GO:0035556 | intracellular signal transduction                        | 1.17E-13 | 2.12E-11  |
| GO:0045595 | regulation of cell differentiation                       | 1.38E-13 | 2.43E-11  |
| GO:0010941 | regulation of cell death                                 | 2.23E-13 | 3.82E-11  |
| GO:0006915 | apoptotic process                                        | 2.75E-13 | 4.57E-11  |
| GO:0001525 | angiogenesis                                             | 4.00E-13 | 6.48E-11  |
| GO:0051093 | negative regulation of developmental process             | 9.17E-13 | 1.45E-10  |
| GO:0009967 | positive regulation of signal transduction               | 2.47E-12 | 3.79E-10  |
| GO:0048585 | negative regulation of response to stimulus              | 3.59E-12 | 5.37E-10  |
| GO:0048646 | anatomical structure formation involved in morphogenesis | 4.02E-12 | 5.88E-10  |
| GO:0006952 | defense response                                         | 8.19E-12 | 1.17E-09  |
| GO:1902531 | regulation of intracellular signal transduction          | 1.25E-11 | 1.74E-09  |
| GO:0034097 | response to cytokine                                     | 2.04E-11 | 2.77E-09  |
| GO:0051094 | positive regulation of developmental process             | 2.59E-11 | 3.44E-09  |
| GO:0006928 | movement of cell or subcellular component                | 2.83E-11 | 3.69E-09  |
| GO:1901342 | regulation of vasculature development                    | 3.63E-11 | 4.63E-09  |
| GO:2000147 | positive regulation of cell motility                     | 3.95E-11 | 4.93E-09  |
| GO:0030335 | positive regulation of cell migration                    | 4.93E-11 | 6.02E-09  |

|            |                                                                          |          |          |
|------------|--------------------------------------------------------------------------|----------|----------|
| GO:0010942 | positive regulation of cell death                                        | 5.47E-11 | 6.56E-09 |
| GO:0043068 | positive regulation of programmed cell death                             | 6.23E-11 | 7.31E-09 |
| GO:0009887 | organ morphogenesis                                                      | 6.81E-11 | 7.84E-09 |
| GO:0051272 | positive regulation of cellular component movement                       | 8.50E-11 | 9.60E-09 |
| GO:0023056 | positive regulation of signaling                                         | 8.99E-11 | 9.97E-09 |
| GO:0040017 | positive regulation of locomotion                                        | 9.12E-11 | 9.93E-09 |
| GO:0048468 | cell development                                                         | 1.24E-10 | 1.33E-08 |
| GO:0008285 | negative regulation of cell proliferation                                | 1.31E-10 | 1.37E-08 |
| GO:0009611 | response to wounding                                                     | 1.40E-10 | 1.44E-08 |
| GO:0043065 | positive regulation of apoptotic process                                 | 1.57E-10 | 1.59E-08 |
| GO:0010647 | positive regulation of cell communication                                | 1.66E-10 | 1.66E-08 |
| GO:0040007 | growth                                                                   | 2.17E-10 | 2.13E-08 |
| GO:0009628 | response to abiotic stimulus                                             | 2.23E-10 | 2.16E-08 |
| GO:0042060 | wound healing                                                            | 5.52E-10 | 5.25E-08 |
| GO:0035295 | tube development                                                         | 6.27E-10 | 5.87E-08 |
| GO:0001816 | cytokine production                                                      | 6.41E-10 | 5.91E-08 |
| GO:0009719 | response to endogenous stimulus                                          | 1.17E-09 | 1.06E-07 |
| GO:0001817 | regulation of cytokine production                                        | 1.19E-09 | 1.06E-07 |
| GO:0006954 | inflammatory response                                                    | 1.21E-09 | 1.06E-07 |
| GO:0009968 | negative regulation of signal transduction                               | 1.32E-09 | 1.15E-07 |
| GO:0071363 | cellular response to growth factor stimulus                              | 1.44E-09 | 1.23E-07 |
| GO:0045765 | regulation of angiogenesis                                               | 1.73E-09 | 1.46E-07 |
| GO:0030198 | extracellular matrix organization                                        | 2.33E-09 | 1.93E-07 |
| GO:0043062 | extracellular structure organization                                     | 2.56E-09 | 2.10E-07 |
| GO:0045596 | negative regulation of cell differentiation                              | 3.62E-09 | 2.93E-07 |
| GO:0070848 | response to growth factor                                                | 4.80E-09 | 3.83E-07 |
| GO:1901343 | negative regulation of vasculature development                           | 6.31E-09 | 4.97E-07 |
| GO:1901700 | response to oxygen-containing compound                                   | 6.74E-09 | 5.24E-07 |
| GO:0032101 | regulation of response to external stimulus                              | 8.55E-09 | 6.56E-07 |
| GO:0032963 | collagen metabolic process                                               | 1.01E-08 | 7.69E-07 |
| GO:0044259 | multicellular organismal macromolecule metabolic process                 | 1.21E-08 | 9.09E-07 |
| GO:0071345 | cellular response to cytokine stimulus                                   | 1.37E-08 | 1.01E-06 |
| GO:0051128 | regulation of cellular component organization                            | 1.40E-08 | 1.02E-06 |
| GO:0010648 | negative regulation of cell communication                                | 1.41E-08 | 1.01E-06 |
| GO:0001501 | skeletal system development                                              | 1.45E-08 | 1.03E-06 |
| GO:0001558 | regulation of cell growth                                                | 1.53E-08 | 1.08E-06 |
| GO:0023057 | negative regulation of signaling                                         | 1.62E-08 | 1.13E-06 |
| GO:0002684 | positive regulation of immune system process                             | 1.72E-08 | 1.19E-06 |
| GO:0071495 | cellular response to endogenous stimulus                                 | 2.03E-08 | 1.38E-06 |
| GO:0060429 | epithelium development                                                   | 2.22E-08 | 1.50E-06 |
| GO:0002682 | regulation of immune system process                                      | 2.23E-08 | 1.49E-06 |
| GO:0008284 | positive regulation of cell proliferation                                | 2.25E-08 | 1.48E-06 |
| GO:0033993 | response to lipid                                                        | 2.76E-08 | 1.80E-06 |
| GO:0016049 | cell growth                                                              | 2.96E-08 | 1.91E-06 |
| GO:0048732 | gland development                                                        | 2.99E-08 | 1.91E-06 |
| GO:1902533 | positive regulation of intracellular signal transduction                 | 3.58E-08 | 2.26E-06 |
| GO:0006468 | protein phosphorylation                                                  | 3.94E-08 | 2.46E-06 |
| GO:0007178 | transmembrane receptor protein serine/threonine kinase signaling pathway | 4.06E-08 | 2.51E-06 |
| GO:0001932 | regulation of protein phosphorylation                                    | 4.39E-08 | 2.68E-06 |
| GO:0030855 | epithelial cell differentiation                                          | 4.84E-08 | 2.93E-06 |
| GO:0001667 | ameboidal-type cell migration                                            | 5.65E-08 | 3.39E-06 |
| GO:0061448 | connective tissue development                                            | 5.97E-08 | 3.54E-06 |
| GO:0030155 | regulation of cell adhesion                                              | 7.05E-08 | 4.14E-06 |

|            |                                                                  |          |          |
|------------|------------------------------------------------------------------|----------|----------|
| GO:0042325 | regulation of phosphorylation                                    | 8.13E-08 | 4.73E-06 |
| GO:0022610 | biological adhesion                                              | 8.33E-08 | 4.80E-06 |
| GO:0051130 | positive regulation of cellular component organization           | 8.42E-08 | 4.80E-06 |
| GO:0031325 | positive regulation of cellular metabolic process                | 9.76E-08 | 5.51E-06 |
| GO:0060284 | regulation of cell development                                   | 1.02E-07 | 5.69E-06 |
| GO:0040008 | regulation of growth                                             | 1.03E-07 | 5.71E-06 |
| GO:0048608 | reproductive structure development                               | 1.21E-07 | 6.67E-06 |
| GO:0051174 | regulation of phosphorus metabolic process                       | 1.33E-07 | 7.23E-06 |
| GO:0007169 | transmembrane receptor protein tyrosine kinase signaling pathway | 1.47E-07 | 7.95E-06 |
| GO:0061458 | reproductive system development                                  | 1.59E-07 | 8.50E-06 |
| GO:0001655 | urogenital system development                                    | 1.62E-07 | 8.57E-06 |
| GO:0000165 | MAPK cascade                                                     | 1.74E-07 | 9.13E-06 |
| GO:0010720 | positive regulation of cell development                          | 1.98E-07 | 1.03E-05 |
| GO:0023014 | signal transduction by protein phosphorylation                   | 2.10E-07 | 1.08E-05 |
| GO:0009607 | response to biotic stimulus                                      | 2.24E-07 | 1.14E-05 |
| GO:0032964 | collagen biosynthetic process                                    | 2.52E-07 | 1.28E-05 |
| GO:0007155 | cell adhesion                                                    | 2.59E-07 | 1.30E-05 |
| GO:0019220 | regulation of phosphate metabolic process                        | 2.59E-07 | 1.29E-05 |
| GO:0014070 | response to organic cyclic compound                              | 2.85E-07 | 1.41E-05 |
| GO:0044236 | multicellular organism metabolic process                         | 3.06E-07 | 1.50E-05 |
| GO:0043066 | negative regulation of apoptotic process                         | 3.09E-07 | 1.50E-05 |
| GO:0002685 | regulation of leukocyte migration                                | 3.48E-07 | 1.68E-05 |
| GO:0072001 | renal system development                                         | 3.88E-07 | 1.86E-05 |
| GO:0090287 | regulation of cellular response to growth factor stimulus        | 3.96E-07 | 1.88E-05 |
| GO:0001822 | kidney development                                               | 4.02E-07 | 1.90E-05 |
| GO:0051707 | response to other organism                                       | 4.31E-07 | 2.02E-05 |
| GO:0043207 | response to external biotic stimulus                             | 4.45E-07 | 2.06E-05 |
| GO:0043069 | negative regulation of programmed cell death                     | 4.99E-07 | 2.30E-05 |
| GO:0032835 | glomerulus development                                           | 5.03E-07 | 2.30E-05 |
| GO:0048762 | mesenchymal cell differentiation                                 | 5.48E-07 | 2.49E-05 |
| GO:0006955 | immune response                                                  | 6.18E-07 | 2.78E-05 |
| GO:0009893 | positive regulation of metabolic process                         | 6.26E-07 | 2.80E-05 |
| GO:0030323 | respiratory tube development                                     | 7.05E-07 | 3.13E-05 |
| GO:0072593 | reactive oxygen species metabolic process                        | 7.63E-07 | 3.36E-05 |
| GO:0000904 | cell morphogenesis involved in differentiation                   | 8.00E-07 | 3.50E-05 |
| GO:0010632 | regulation of epithelial cell migration                          | 8.11E-07 | 3.52E-05 |
| GO:0001818 | negative regulation of cytokine production                       | 8.46E-07 | 3.64E-05 |
| GO:0032268 | regulation of cellular protein metabolic process                 | 8.66E-07 | 3.71E-05 |
| GO:0060548 | negative regulation of cell death                                | 9.28E-07 | 3.94E-05 |
| GO:0051246 | regulation of protein metabolic process                          | 9.67E-07 | 4.08E-05 |
| GO:2000181 | negative regulation of blood vessel morphogenesis                | 1.01E-06 | 4.24E-05 |
| GO:0060485 | mesenchyme development                                           | 1.04E-06 | 4.34E-05 |
| GO:0003007 | heart morphogenesis                                              | 1.30E-06 | 5.36E-05 |
| GO:0043408 | regulation of MAPK cascade                                       | 1.48E-06 | 6.05E-05 |
| GO:0002252 | immune effector process                                          | 1.64E-06 | 6.67E-05 |
| GO:0035270 | endocrine system development                                     | 1.74E-06 | 7.03E-05 |
| GO:0007492 | endoderm development                                             | 1.76E-06 | 7.06E-05 |
| GO:0010604 | positive regulation of macromolecule metabolic process           | 1.95E-06 | 7.77E-05 |
| GO:0048729 | tissue morphogenesis                                             | 2.00E-06 | 7.92E-05 |
| GO:0031324 | negative regulation of cellular metabolic process                | 2.04E-06 | 8.06E-05 |
| GO:0001934 | positive regulation of protein phosphorylation                   | 2.13E-06 | 8.33E-05 |
| GO:0030324 | lung development                                                 | 2.14E-06 | 8.34E-05 |
| GO:0002009 | morphogenesis of an epithelium                                   | 2.32E-06 | 8.97E-05 |



|            |                                            |          |          |
|------------|--------------------------------------------|----------|----------|
| GO:0001503 | ossification                               | 2.32E-06 | 8.92E-05 |
| GO:0071675 | regulation of mononuclear cell migration   | 2.35E-06 | 8.97E-05 |
| GO:0031399 | regulation of protein modification process | 2.48E-06 | 9.40E-05 |

Table S2. Overrepresented GO terms for autosomal down-regulated genes ( $\leq 1/2$ -fold with significance)

| GOID       | Term                                         | p-value  | Benjamini |
|------------|----------------------------------------------|----------|-----------|
| GO:0034660 | ncRNA metabolic process                      | 8.29E-21 | 2.04E-17  |
| GO:0034470 | ncRNA processing                             | 1.55E-16 | 1.37E-13  |
| GO:0022613 | ribonucleoprotein complex biogenesis         | 4.71E-15 | 3.83E-12  |
| GO:0042254 | ribosome biogenesis                          | 4.73E-14 | 2.91E-11  |
| GO:0006396 | RNA processing                               | 2.31E-12 | 1.13E-09  |
| GO:0006364 | rRNA processing                              | 9.71E-12 | 3.98E-09  |
| GO:0016072 | rRNA metabolic process                       | 1.66E-11 | 5.84E-09  |
| GO:0006520 | cellular amino acid metabolic process        | 1.13E-09 | 3.48E-07  |
| GO:0006399 | tRNA metabolic process                       | 5.60E-09 | 1.53E-06  |
| GO:1901566 | organonitrogen compound biosynthetic process | 7.32E-08 | 1.80E-05  |
| GO:1901605 | alpha-amino acid metabolic process           | 2.13E-07 | 4.77E-05  |

Ohhata, T., Hoki, Y., Sasaki, H. and Sado, T. (2008) Crucial role of antisense transcription across the Xist promoter in Tsix-mediated Xist chromatin modification. *Development (Cambridge, England)*, **135**, 227-235.

Sado, T., Hoki, Y. and Sasaki, H. (2005) Tsix silences Xist through modification of chromatin structure. *Developmental cell*, **9**, 159-165.
